# Supplementary material for: Exploration and practice of home care mode for elderly with stroke disability based on ICF theory
Source: Research Square preprint supplement (doi:10.21203/rs.3.rs-6217389/v1), 2025-07-16
Supplement: Supplementary file 1 [file 33c7c50d4c81c77621e0e6bb.xlsx]

## Sheet: 照护者25.4.1
分组	Sex（ Male：1）	Age	Primary caregivers（sons and daughters：1）	Educational level（ Primary and below：1；Secondary and above：2）	career（businessmen：workers：2；peasants：3；Sth else：4）	care burden	care ability	care burden（After）	care ability（After）
1	1	67	1	1	1	80	52	79	53
1	2	68	2	1	3	78	50	63	52
1	1	55	2	1	1	85	53	83	49
1	1	56	2	1	1	86	52	74	51
1	1	65	2	1	4	75	47	71	52
1	2	45	1	2	1	77	46	72	47
1	2	76	2	1	3	65	53	69	49
1	2	55	1	1	1	89	55	74	50
1	2	62	2	1	4	67	43	82	52
1	1	72	1	1	1	78	46	80	57
1	2	70	2	1	4	79	47	78	56
1	2	45	2	2	1	84	45	63	57
1	2	40	1	2	1	85	45	74	59
1	2	55	1	1	1	86	53	63	49
1	2	58	2	1	1	67	55	74	41
1	2	38	2	1	4	76	53	85	37
1	1	68	2	1	3	76	33	80	48
1	1	69	1	1	1	78	46	82	58
1	1	46	1	2	2	65	53	74	50
1	2	55	2	2	2	78	47	71	48
1	1	68	2	1	1	67	46	69	54
1	1	64	1	1	1	63	48	81	57
1	2	66	2	1	4	75	51	78	56
1	2	68	2	1	1	83	53	80	54
1	2	70	1	1	4	79	53	78	48
1	2	76	2	1	1	65	57	70	49
1	2	65	2	1	1	79	44	53	52
1	1	58	2	1	1	89	51	64	49
1	2	76	1	1	1	85	45	63	57
1	1	36	2	2	2	73	43	74	60
1	1	40	2	2	2	76	42	78	46
1	2	32	1	2	3	68	53	80	38
1	2	69	2	2	1	89	45	82	41
1	1	72	1	1	1	85	46	71	46
1	1	70	2	1	1	87	48	75	44
1	2	76	2	1	1	65	53	69	49
1	2	55	2	1	1	89	55	74	50
1	2	62	2	1	4	67	43	82	52
1	1	72	2	1	1	78	46	80	57
1	2	70	2	1	4	79	47	78	56
1	2	45	2	2	1	84	45	63	57
1	2	40	2	2	1	85	45	74	59
1	2	55	2	1	1	86	53	63	49
1	2	58	2	1	1	67	55	74	41
1	2	38	2	1	1	76	53	85	37
1	1	68	1	1	3	76	33	80	48
1	1	69	2	1	1	78	46	82	58
1	1	46	2	2	2	65	53	74	50
1	2	55	2	2	2	78	47	71	48
1	1	68	1	1	1	67	46	69	54
1	1	64	2	1	1	63	48	81	57
1	2	66	1	1	1	75	51	78	56
2	2	45	2	2	1	84	45	63	57
2	2	40	2	2	1	85	45	74	59
2	2	76	2	1	1	87	45	77	60
2	2	43	2	1	1	78	47	68	59
2	2	46	2	2	1	75	48	65	54
2	2	32	2	1	1	76	43	66	53
2	2	66	2	1	1	73	45	63	60
2	1	75	1	2	1	78	46	68	72
2	1	70	2	1	4	86	48	76	60
2	1	65	2	1	1	84	53	74	63
2	2	58	2	1	1	82	52	72	64
2	2	76	1	2	3	67	53	57	62
2	2	40	2	2	1	78	55	68	62
2	2	55	2	1	1	67	45	57	70
2	2	58	2	1	1	78	37	68	72
2	1	38	2	2	1	89	33	79	70
2	1	56	2	1	1	84	44	74	40
2	2	69	2	1	1	86	54	76	53
2	1	46	2	2	1	78	46	68	60
2	1	55	2	2	2	75	44	65	54
2	2	68	2	1	2	73	50	63	53
2	1	64	2	2	3	85	53	75	68
2	2	67	2	1	1	82	52	72	67
2	1	56	2	1	2	84	50	74	68
2	2	70	2	1	1	82	44	72	50
2	2	45	1	1	1	74	45	64	63
2	2	68	2	1	2	57	48	47	70
2	2	57	2	1	1	68	45	58	64
2	1	56	2	1	1	67	53	57	63
2	2	65	1	2	1	78	56	68	65
2	2	45	2	2	2	82	42	72	68
2	2	76	2	2	1	84	34	74	60
2	2	38	2	1	1	86	37	76	52
2	1	62	1	2	1	75	42	65	53
2	1	72	2	1	1	79	40	69	55
2	2	55	2	1	1	67	45	45	70
2	2	58	2	1	1	78	37	47	72
2	1	38	2	2	1	89	33	48	70
2	1	56	2	1	1	84	44	43	40
2	2	69	2	1	1	86	54	45	53
2	1	46	1	2	1	78	46	46	60
2	1	55	2	2	2	75	44	48	54
2	2	68	2	1	2	73	50	53	53
2	1	64	2	2	3	85	53	52	68
2	2	67	2	1	1	82	52	53	67
2	1	56	2	1	2	84	50	74	68
2	2	70	2	1	1	82	44	72	50
2	2	45	2	1	1	74	45	64	63
2	2	68	1	1	2	57	48	47	70
2	2	57	1	1	1	68	45	58	64
2	1	56	1	1	1	67	53	57	63
2	2	65	1	2	1	78	56	68	65
