# Supplementary material for: Exploration and practice of home care mode for elderly with stroke disability based on ICF theory
Source: Research Square preprint supplement (doi:10.21203/rs.3.rs-6217389/v1), 2025-07-16
Supplement: Supplementary file 2 [file 8f9aa4e60c064ca5be904e78.xlsx]

## Sheet: disabled elderly
组别	Sex（ Male：1）	Age	Educational level（ Primary and below：1；Secondary and above：2）	current address（ country1；city：2）	Degree of disability（Light：1；medium：2）	financial situation（carry a balance：1；break-even：2；losses：3）	Family life situation（with extended family：1；Institutions for the elderly：2；couples：3；live alone：4）	family care indices	survival quality	family care indices（after）	survival quality（After）
1	1	61	2	1	1	2	2	12	77	11	68
1	2	75	1	1	1	2	3	11	65	12	63
1	1	65	2	2	1	3	1	12	78	11	62
1	1	73	1	1	2	2	2	13	56	15	68
1	1	59	1	1	1	2	2	15	78	17	59
1	1	72	1	1	1	3	4	10	65	12	71
1	2	62	2	2	1	1	2	15	66	17	87
1	1	65	2	2	1	2	2	12	53	14	61
1	1	70	1	1	1	2	2	10	77	12	70
1	1	65	1	2	2	2	2	15	83	17	80
1	1	76	1	1	1	2	2	10	45	12	77
1	1	88	1	1	1	1	2	10	65	12	60
1	1	77	1	1	1	1	2	10	63	12	61
1	1	64	1	1	2	1	2	10	68	12	80
1	2	69	1	1	2	2	2	10	64	12	82
1	1	80	1	1	1	1	4	8	63	10	67
1	2	67	1	1	1	2	2	11	73	13	60
1	1	64	1	2	1	2	2	15	72	17	53
1	1	79	1	1	2	1	2	10	65	12	70
1	2	75	1	1	1	2	2	15	69	17	50
1	1	85	1	1	1	2	1	6	67	8	69
1	2	72	1	1	1	2	2	11	56	13	71
1	1	77	1	1	1	1	2	10	73	12	63
1	1	64	1	1	2	1	2	10	59	12	78
1	2	69	1	1	2	2	2	10	68	12	80
1	1	80	1	1	1	1	4	8	87	10	82
1	2	67	1	1	1	2	2	11	56	13	60
1	1	64	1	2	1	2	2	15	76	17	49
1	1	79	1	1	2	1	2	10	56	12	71
1	2	75	1	1	1	2	2	15	66	17	70
1	1	85	1	1	1	2	1	6	57	8	61
1	2	72	1	1	1	2	2	11	69	13	76
1	1	70	1	1	1	2	2	10	63	12	67
1	1	65	1	2	2	2	2	15	58	17	66
1	1	76	1	1	1	2	2	10	72	12	64
1	2	62	2	2	2	1	2	10	77	12	70
1	1	65	2	2	2	2	2	15	83	17	80
1	1	70	1	1	2	2	2	10	45	12	77
1	1	65	1	2	2	2	2	10	65	12	60
1	1	76	1	1	2	2	3	10	63	12	61
1	1	88	1	1	2	1	2	10	68	12	80
1	1	77	1	1	2	1	3	10	64	12	82
1	1	64	1	1	1	1	3	8	63	10	67
1	2	69	1	1	2	2	2	11	73	13	60
1	1	80	1	1	1	1	4	15	72	17	53
1	2	67	1	1	2	2	2	10	65	12	70
1	1	64	1	2	1	2	2	15	69	17	50
1	1	79	1	1	1	1	2	6	67	8	69
1	2	75	1	1	1	2	2	11	56	13	71
1	1	85	1	1	1	2	1	10	73	12	63
1	2	72	1	1	2	2	2	10	59	12	78
1	1	77	1	1	2	1	2	10	68	12	80
2	1	61	2	1	2	2	2	11	76	14	89
2	2	75	1	1	2	2	3	13	65	16	77
2	1	65	2	2	2	3	1	10	78	13	90
2	1	73	1	1	2	2	2	13	64	16	68
2	1	68	1	1	1	2	2	15	55	18	90
2	1	72	1	1	1	3	4	10	67	13	77
2	2	62	2	2	1	1	2	15	83	18	78
2	1	65	2	2	1	2	2	12	57	15	65
2	1	70	1	1	1	2	2	10	66	13	89
2	1	65	1	2	2	2	2	15	76	18	95
2	1	76	1	1	1	2	2	10	73	13	57
2	1	88	1	1	1	1	2	10	56	13	77
2	1	77	1	1	1	1	2	10	57	13	75
2	1	64	1	1	2	1	2	10	76	13	80
2	2	66	1	1	2	2	2	10	78	13	76
2	1	80	1	1	1	1	4	8	63	11	75
2	2	67	1	1	1	2	2	11	56	14	85
2	1	64	1	2	1	2	2	15	49	18	84
2	1	79	1	1	2	1	2	10	66	13	77
2	2	72	1	1	1	2	2	15	46	18	81
2	1	85	1	1	1	2	1	6	65	9	79
2	2	72	1	1	1	2	2	11	67	14	68
2	1	61	2	1	1	2	2	11	59	13	85
2	2	75	1	1	1	2	3	13	74	13	71
2	1	65	2	2	1	3	1	10	76	13	80
2	1	73	1	1	2	2	2	13	78	11	99
2	1	59	1	1	1	2	2	15	56	14	68
2	1	72	1	1	1	3	4	10	45	18	88
2	2	61	2	2	1	1	2	15	67	13	68
2	1	65	2	2	1	2	2	12	66	18	78
2	1	70	1	1	1	2	2	10	57	9	69
2	1	65	1	2	2	2	2	15	72	14	81
2	1	76	1	1	1	2	2	10	63	13	75
2	2	77	1	1	1	2	2	15	62	18	70
2	1	85	1	1	1	2	1	6	60	13	84
2	2	62	2	2	1	1	2	11	56	14	85
2	1	65	2	2	1	2	2	15	49	18	84
2	1	70	1	1	2	2	2	10	66	13	77
2	1	65	1	2	2	2	2	15	46	18	81
2	1	76	1	1	2	2	2	6	65	9	79
2	1	88	1	1	2	1	2	11	67	14	68
2	1	77	1	1	2	1	2	11	59	13	85
2	1	64	1	1	2	1	2	13	74	13	71
2	2	66	1	1	2	2	2	10	76	13	80
2	1	80	1	1	2	1	4	13	78	11	99
2	2	67	1	1	1	2	2	15	56	14	68
2	1	64	1	2	1	2	3	10	45	18	88
2	1	79	1	1	1	1	2	15	67	13	68
2	2	72	1	1	1	2	2	12	66	18	78
2	1	85	1	1	1	2	1	10	57	9	69
2	2	72	1	1	2	2	2	15	72	14	81
2	1	61	2	1	1	2	2	10	63	13	75
